# Supplementary material for: Identification of Enantiomeric Byproducts During Microalgae-Mediated Transformation of Metoprolol by MS/MS Spectrum Based Networking
Source: Front Microbiol. 2018 Sep 7;9:2115. doi: 10.3389/fmicb.2018.02115 (PMC6137207; doi:10.3389/fmicb.2018.02115)
Supplement: Supplementary file 1 [file Table_1.DOCX]

**Supplemental Information**

**Identification of Enantiomeric Byproducts During Microalgae-mediated Transformation of Metoprolol by MS/MS Spectrum Based Networking**

Min Lv1,2, Ching Lo3, Cheng-Chih Hsu3, Yuwen Wang4, Yin-Ru Chiang5, Qian Sun4, Yang Wu4, Yan Li4, Lingxin Chen1, Chang-Ping Yu2*

1CAS Key Laboratory of Coastal Environmental Processes and Ecological Remediation, Yantai Institute of Coastal Zone Research, Chinese Academy of Sciences, Yantai 264003, China

2Graduate Institute of Environmental Engineering, National Taiwan University, Taipei 10617, Taiwan

3Department of Chemistry, National Taiwan University, Taipei 10617, Taiwan

4CAS Key Laboratory of Urban Pollutant Conversion, Institute of Urban Environment, Chinese Academy of Sciences, Xiamen 361021, China

5Biodiversity Research Center, Academia Sinica, Taipei, Taiwan

* Corresponding Author:

Dr. Chang-Ping Yu, Tel: 886-2-3366-3729, Email: cpyu@ntu.edu.tw

**Supplemental Information**

24 pages, including 8 tables and 6 figures.

Page 3 provides details on the sampling and analytical methods.

Pages 4 includes Table S1, which is referred to directly in the Materials and methods portion.

Pages 5-10 include Figure S1-S6, which are referred to directly in the Results and discussion portion of the text.

Pages 11-24 include Table S2-S8, which are the detailed MS/MS peaks annotation of MPL standard and TPs.

**Material and methods**

**Analysis of water quality parameters**

Samples were ﬁltered through 0.45 μm pore-size cellulose ﬁlters (Millipore, Billerica, MA, USA) and frozen until analysis within a week. PO43-- P in the ﬁltrate was processed following an alkaline potassium persulfate digestion. Ammonium (NH4+), nitrate (NO3- -N) in the filtrate as well as PO43-- P in the digest were analyzed by a ﬂow injection analyzer (QC8500, Lachat®, Loveland, Co., USA).

**Sample preparation for identification of transformation products**

Oasis HLB cartridge (500 mg, 6 mL, Waters) were preconditioned with 20 mL methanol, 6 mL water, and 6 mL water under pH 2.0. The samples were passed through the cartridges at a flow rate around 3 mL/min. After the cartridges were dried under an airstream for 10 min, analytes were eluted with 12 mL of methanol and 6 mL of acetone-methanol 50/50 (v/v). The elutes were collected, evaporated to dryness with nitrogen gas and reconstituted to 1.0 mL with methanol.

**TABLE S1**│Component of synthetic wastewater for MPL degradation

| Compound | Concentration (mM) | Compound (trace metal) | Concentration (mM) |
| --- | --- | --- | --- |
| NaNO3 | 0.86 | FeCl2.4H2O | Fe2+ = 0.01 |
| K2HPO4 | 0.19 | MnSO4.H2O | Mn2+ = 0.02 |
| NaCl | 0.43 | (NH4)6 Mo7O24.4H2O | Mo7O246- = 0.001 |
| NaHCO3 | 1 |  | NH4+ = 0.006 |
| MgSO4 | 0.3 | CuSO4 | Cu2+ = 0.005 |
| CaCl2.2H2O | 0.17 | ZnSO4.7H2O | Zn2+ = 0.006 |
| EDTA disodium salt | 0.01 | NiSO4.6H2O | Ni2+ = 0.001 |

**FIGURE S1│** Liquid chromatogram for a 20 d sample during metoprolol degradation by *Haematococcus pluvialis*.

**FIGURE S2**│ The removal of nutrient and metoprolol by *Selenastrum capricornutum* and *Chlorella vulgaris* and their growth in the synthetic effluent. The MPL concentrations were the sum of (S)-MPL and (R)-MPL concentrations.

**FIGURE S3│** (S)-MPL and (R)-MPL concentrations changes versus time during MPL biodegradation by *Scenedesmus quadricauda* Breb (a) and Rayleigh representation of the enantiomeric enrichment of MPL versus MPL biodegradation (b). Insets: Kinetics of first-order biodegradation of the two MPL enantiomers.

**FIGURE S4│** EF changes against time during MPL biodegradation by *Haematococcus pluvialis* and *Scenedesmus quadricauda* Breb.

(a)

(b)

(e)

(d)

(c)

(f)

**FIGURE S5│** LC-HRMS chromatogram of six pairs of transformation products with (a), (b), (c), (d), (e), (f) representing chiral DMPLD, DMPLA, O-DMPL, MPLA, α-HMPLA, α-HMPL, respectively. The extracted chromatogram of the control is shown in the upper window of (a), (b), (c), (d), (e) and (f).

**FIGURE S6│** The HRMS spectrum corresponding to extracted chromatogram peak of [M+H]+ of 284.1858 Da during degradation of MPL by *Chlorella vulgaris*.

**TABLE S2**│ Fragmentation structures of **MPL**

| Structure | Exact mass | Experiment | Error(ppm) |
| --- | --- | --- | --- |
| [M+H]+**(­parent ion)** | 268.1907 | 268.1910 | 1.12 |
| [M-H2O+H]+ | 250.1802 | 250.1800 | -0.80 |
| [M-C3H7+H+H]+ | 226.1438 | 226.1437 | -0.44 |
| [M-H2O-CH3OH+H]+ | 218.1539 | 218.1539 | -0.09 |
| [M-C3H6-CH3OH+H]+ | 194.1176 | 194.1174 | -1.03 |
| [M-H2O-C3H7NH]+ | 191.1067 | 191.1066 | -0.52 |
| Structure | Exact mass | Experiment | Error(ppm) |
| [M-H2O-C3H6-CH3OH+H]+ | 176.1070 | 176.1069 | -0.57 |
| [M-H2O-CH3OH-C3H7NH]+ | 159.0804 | 159.0804 | -0.57 |
| [M-CH3OC2H4C6H4OH+H]+ | 116.1070 | 116.1069 | -0.86 |
| [M- CH3OC2H4C6H4O-H2O]+ | 98.0964 | 98.0963 | -1.02 |

**TABLE S3**│ Fragmentation structures of **α-HMPL**

| Structure | Exact mass | Experiment | Error(ppm) |
| --- | --- | --- | --- |
| [M+H]+ **(­parent ion)** | 284.1856 | 284.1858 | 0.70 |
| [M-H2O+H]+ | 266.1751 | 266.1753 | 0.75 |
| [M-2H2O+H]+ | 248.1645 | 248.1646 | 0.40 |
| [M-C3H7+H+H]+ | 242.1387 | 242.1390 | 1.24 |
| [M-H2O -C3H7 +H+H]+ | 224.1281 | 224.1282 | 0.45 |
| [M-H2O-C3H7NH]+ | 207.1016 | 207.1017 | 0.48 |
| Structure | Exact mass | Experiment | Error(ppm) |
| [M-H2O-C3H7NH-CH3OH]+ | 175.0754 | 175.0753 | -0.57 |
| [M-H2O-C3H7NH-CH3OCH2CHOH+H]+ | 133.0648 | 133.0648 | 0.00 |
| [M-CH3OCH2CHOHC6H4OH+H]+ | 116.1070 | 116.1070 | 0.00 |
| [M-CH3OCH2CHOHC6H4O-H2O]+ | 98.0964 | 98.0964 | -0.41 |

**TABLE S4**│ Fragmentation structures of **α-HMPLA**

| Structure | Exact mass | Experiment | Error(ppm) |
| --- | --- | --- | --- |
| [M+H]+ **(­parent ion)** | 284.1493 | 284.1494 | 0.35 |
| [M-H2O+H]+ | 266.1387 | 266.1384 | -1.13 |
| [M-2H2O+H]+ | 248.1281 | 248.1281 | -0.20 |
| [M-C3H7+H+H]+ | 242.1023 | 242.1021 | -0.83 |
| [M-CO2H]+ | 238.1438 | 238.1434 | -1.68 |
| Structure | Exact mass | Experiment | Error(ppm) |
| [M-H2O-C3H7NH]+ | 207.0652 | 207.0652 | 0.19 |
| [M-2H2O-C3H7+H+H] | 206.0812 | 206.0812 | 0.24 |
| [M-H2O-C3H7NH-CO2HCHOH+H]+ | 133.0648 | 133.0650 | 1.50 |
| [M-CO2HCHOHC6H4OH+H]+ | 116.1070 | 116.1070 | 0.00 |
| [M-H2O-CO2HCHOHC6H4O]+ | 98.0964 | 98.0964 | -0.20 |

**TABLE S5**│ Fragmentation structures of **MPLA**

| Structure | Exact mass | Experiment | Error(ppm) |
| --- | --- | --- | --- |
| [M+H]+ **(­parent ion)** | 268.1543 | 268.1544 | 0.37 |
| [M-H2O+H]+ | 250.1438 | 250.1439 | 0.40 |
| [M-C3H7+H+H]+ | 226.1074 | 226.1075 | 0.44 |
| [M-H2O-C3H7+H+H]+ | 208.0968 | 208.0971 | 1.44 |
| [M-H2O-C3H7NH]+ | 191.0703 | 191.0704 | 0.53 |
| [M-H2O-C3H7NH2-CO2H]+ | 145.0648 | 145.0649 | 0.69 |
| Structure | Exact mass | Experiment | Error(ppm) |
| [M-CO2HCH2C6H4OH+H]+ | 116.1070 | 116.1070 | 0.00 |
| [M-H2O -CO2HCH2C6H4O]+ | 98.0964 | 98.0964 | -0.20 |

**TABLE S6**│ Fragmentation structures of **O-DMPL**

| Structure | Exact mass | Experiment | Error(ppm) |
| --- | --- | --- | --- |
| [M+H]+ **(­parent ion)** | 254.1751 | 254.1753 | 0.79 |
| [M-H2O+H]+ | 236.1645 | 236.1649 | 1.69 |
| [M-2H2O+H]+ | 218.1539 | 218.1543 | 1.83 |
| [M-C3H7+H+H]+ | 212.1281 | 212.1285 | 1.88 |
| [M-C3H7-H2O+H]+ | 194.1176 | 194.1183 | 3.61 |
| [M-H2O-C3H7NH]+ | 177.0910 | 177.0913 | 1.69 |
| Structure | Exact mass | Experiment | Error(ppm) |
| [M-2H2O-C3H6+H]+ | 176.1070 | 176.1073 | 1.70 |
| [M-2H2O-C3H7NH]+ | 159.0804 | 159.0807 | 1.89 |
| [M-H2O-CH2OHCH2-C3H7NH+H]+ | 133.0648 | 133.0650 | 1.50 |
| [M-CH2OHCH2C6H4OH+H]+ | 116.1070 | 116.1071 | 0.86 |
| [M-H2O-CH2OHCH2C6H4O]+ | 98.0964 | 98.0963 | -1.02 |

**TABLE S7**│ Fragmentation structures of **DMPLA**

| Structure | Exact mass | Experiment | Error(ppm) |
| --- | --- | --- | --- |
| [M+H]+ **(­parent ion)** | 254.1387 | 254.1389 | 0.79 |
| [M-H2O+H]+ | 236.1281 | 236.1282 | 0.42 |
| [M-C3H7+H+H]+ | 212.0917 | 212.0918 | 0.47 |
| [M-H2O-C3H7+H+H]+ | 194.0812 | 194.0812 | 0.05 |
| [M-H2O-C3H7NH]+ | 177.0546 | 177.0546 | 0.06 |
| Structure | Exact mass | Experiment | Error(ppm) |
| [M-H2O-C3H6-OH]+ | 176.0706 | 176.0706 | 0.00 |
| [M-H2O-CO2-C3H7NH]+ | 133.0648 | 133.0648 | 0.23 |
| [M-CO2HC6H4OH+H]+ | 116.1070 | 116.1070 | -0.09 |
| [M-H2O-CO2HC6H4O]+ | 98.0964 | 98.0964 | -0.41 |

**TABLE S8**│ Fragmentation structures of **DMPLD**

| Structure | Exact mass | Experiment | Error(ppm) |
| --- | --- | --- | --- |
| [M+H]+ **(­parent ion)** | 238.1438 | 238.1439 | 0.37 |
| [M-H2O+H]+ | 220.1332 | 220.1335 | 1.36 |
| [M-C3H7+H+H]+ | 196.0968 | 196.0969 | 0.51 |
| [M-H2O-C3H7+H+H]+. | 178.0863 | 178.0864 | 0.56 |
| [M-H2O -C3H7NH]+ | 161.0597 | 161.0598 | 0.62 |
| [M-H2O-CO2-C3H7NH]+ | 133.0648 | 133.0647 | -0.75 |
| Structure | Exact mass | Experiment | Error(ppm) |
| [M-CH2OC6H4OH+H]+ | 116.1070 | 116.1070 | -0.06 |
| [M-H2O-CH2OC6H4O]+ | 98.0964 | 98.0962 | -2.04 |
